# Supplementary material for: Systematic review and meta-analysis of the effectiveness and perinatal outcomes of COVID-19 vaccination in pregnancy
Source: Springer Nature journal article supplement (doi:10.1038/s41467-022-30052-w), 2022-05-10
Supplement: MOESM1 [file 41467_2022_30052_MOESM1_ESM.pdf]

## SUPPLEMENTARY INFORMATION

### **Title: Systematic Review and meta-analysis of the effectiveness and Perinatal Outcomes of COVID-19 Vaccination in Pregnancy**

Smriti Prasad, MRCOG<sup>1</sup>, Erkan Kalafat, MD MSc<sup>2,3</sup>, Helena Blakeway, MBChB<sup>1</sup>, Rosemary Townsend, MRCOG<sup>4,5</sup>, Pat O'Brien, FRCOG<sup>6,7</sup>, Edward Morris, FRCOG<sup>6,8</sup>, Tim Draycott, FRCOG<sup>6,9</sup>, Shakila Thangaratinam, FRCOG<sup>10</sup>, Kirsty Le Doare, PhD<sup>11</sup>, Shamez Ladhani, PhD<sup>12,13</sup>, Peter von Dadelszen, FRCOG<sup>14</sup>, Laura A. Magee, FRCOG<sup>14</sup>, Paul Heath, FRCPCH<sup>11</sup>, Asma Khalil, MRCOG<sup>1,5\*</sup>

<sup>1</sup>Fetal Medicine Unit, St George's Hospital, St George's University of London, UK

<sup>2</sup>Middle East Technical University, Faculty of Arts and Sciences, Department of Statistics, Ankara, Turkey

<sup>3</sup>Koc University, School of Medicine, Department of Obstetrics and Gynaecology, Istanbul, Turkey

<sup>4</sup>Usher Institute of Population Health Sciences and Informatics, University of Edinburgh, Edinburgh, UK

<sup>5</sup>Vascular Biology Research Centre, Molecular and Clinical Sciences Research Institute, St George's University of London, UK

<sup>6</sup>The Royal College of Obstetricians and Gynaecologists, London, UK

<sup>7</sup>University College London Hospitals NHS Foundation Trust, London, UK

<sup>8</sup>Norfolk and Norwich University Hospitals NHS Foundation Trust, Norwich, Norfolk, UK

<sup>9</sup>North Bristol NHS Trust Department of Women's Health, Westbury on Trym, UK

<sup>10</sup>Institute of Metabolism and Systems Research, WHO Collaborating Centre for Women's Health, University of Birmingham, Birmingham, UK

<sup>11</sup>Paediatric Infectious Diseases Research Group and Vaccine Institute, Institute of Infection and Immunity, St George's University of London, London, UK

<sup>12</sup> Immunisation and Countermeasures Division, Public Health England

<sup>13</sup>British Paediatric Surveillance Unit, Royal College of Paediatrics and Child Health

<sup>14</sup>Institute of Women and Children's Health, School of Life Course Sciences, King's College London, London, UK

| <b>Contents</b>                                                                        | <b>Page</b> |
|----------------------------------------------------------------------------------------|-------------|
| <b>Table S1.</b> A list of the excluded studies with reasons for their exclusion.....  | 3-6         |
| <b>Table S2.</b> Characteristics of the studies included in the systematic review..... | 7-18        |
| <b>Table S3.</b> ROBINS-I risk of bias assessment of observational studies.....        | 19          |
| <b>Table S4.</b> Cochrane Risk of Bias Tool 2 for randomized trials.....               | 20          |
| <b>Table S5.</b> Literature search strategy. ....                                      | 21          |

**Table S1.** A list of the excluded studies with reasons for their exclusion.

|    | <b>Studies</b>                                                                                                                                                                                                                                                | <b>Exclusion reason</b>                                                                    |
|----|---------------------------------------------------------------------------------------------------------------------------------------------------------------------------------------------------------------------------------------------------------------|--------------------------------------------------------------------------------------------|
| 1. | Rottenstreich A, Zarbiv G, Oiknine-Djian E, Zigran R, Wolf DG, Porat S. Efficient maternofetal transplacental transfer of anti- SARS-CoV-2 spike antibodies after antenatal SARS-CoV-2 BNT162b2 mRNA vaccination. <i>Clin Infect Dis.</i> 2021 Apr 3;ciab266. | Unsuitable outcomes (transplacental transfer of antibodies)                                |
| 2. | Burd I, Kino T, Segars J. The Israeli study of Pfizer BNT162b2 vaccine in pregnancy: considering maternal and neonatal benefits. <i>J Clin Invest.</i> 2021 Jul 1;131(13):150790.                                                                             | Unsuitable study design (review commentary)                                                |
| 3. | Riviello C, Pontello V. Maternal and neonatal SARS-CoV-2 antibodies assessment after mRNA maternal vaccination in the third trimester of pregnancy. <i>Int J Gynaecol Obstet.</i> 2021 Sep;154(3):565–6..                                                     | Unsuitable study design (case report)                                                      |
| 4. | Paul G, Chad R. Newborn antibodies to SARS-CoV-2 detected in cord blood after maternal vaccination – a case report. <i>BMC Pediatrics.</i> 2021 Mar 22;21(1):138.                                                                                             | Unsuitable study design (case report)                                                      |
| 5. | Male V. Are COVID-19 vaccines safe in pregnancy? <i>Nat Rev Immunol.</i> 2021 Apr;21(4):200–1.                                                                                                                                                                | Unsuitable study design (comment)                                                          |
| 6. | Atyeo C, DeRiso EA, Davis C, et al. COVID-19 mRNA vaccines drive differential Fc-functional profiles in pregnant, lactating, and non-pregnant women. Preprint. <i>bioRxiv.</i> 2021;2021.04.04.438404. Published 2021 Apr 5. doi:10.1101/2021.04.04.438404    | Unsuitable outcomes (humoral vaccine response)                                             |
| 7. | Orvieto R, Noach-Hirsh M, Segev-Zahav A, Haas J, Nahum R, Aizer A. Does mRNA SARS-CoV-2 vaccine influence patients' performance during IVF-ET cycle? <i>Reprod Biol Endocrinol.</i> 2021 May 13;19:69.                                                        | Unsuitable outcomes (stimulation characteristics and embryological variables in IVF cycle) |
| 8. | Ciapponi A, Bardach A, Mazzoni A, Alconada T, Anderson SA, Argento FJ, et al. Safety of components and platforms of COVID-19 vaccines considered for use in pregnancy: A rapid review. <i>Vaccine.</i> 2021 Aug 13;S0264-410X(21)01067-7.                     | Unsuitable intervention (different vaccine platforms used in pregnant women)               |

|     |                                                                                                                                                                                                                                                                                                                         |                                                                                                |
|-----|-------------------------------------------------------------------------------------------------------------------------------------------------------------------------------------------------------------------------------------------------------------------------------------------------------------------------|------------------------------------------------------------------------------------------------|
| 9.  | Mose A, Yeshaneh A. COVID-19 Vaccine Acceptance and Its Associated Factors Among Pregnant Women Attending Antenatal Care Clinic in Southwest Ethiopia: Institutional-Based Cross-Sectional Study. <i>Int J Gen Med</i> . 2021;14:2385–95.                                                                               | Unsuitable outcomes (COVID-19 vaccine acceptance)                                              |
| 10. | Hadar E, Dollinger S, Wiznitzer A. Coronavirus disease and vaccination during pregnancy and childbirth: a review of the Israeli perspective and experience. <i>J Matern Fetal Neonatal Med</i> . 2021 Jun 15;1–12.                                                                                                      | Unsuitable study design (review)                                                               |
| 11. | Collier A-RY, McMahan K, Yu J, Tostanoski LH, Aguayo R, Ansel J, et al. Immunogenicity of COVID-19 mRNA Vaccines in Pregnant and Lactating Women. <i>JAMA</i> . 2021 Jun 15;325(23):2370–80.                                                                                                                            | Unsuitable outcomes (antibody and site-specific T cell response)                               |
| 12. | Razzaghi H, Meghani M, Pingali C, Crane B, Naleway A, Weintraub E, et al. COVID-19 Vaccination Coverage Among Pregnant Women During Pregnancy - Eight Integrated Health Care Organizations, United States, December 14, 2020-May 8, 2021. <i>MMWR Morb Mortal Wkly Rep</i> . 2021 Jun 18;70(24):895–9.                  | Unsuitable outcomes (vaccine coverage)                                                         |
| 13. | Zdanowski W, Waśniewski T. Evaluation of SARS-CoV-2 Spike Protein Antibody Titers in Cord Blood after COVID-19 Vaccination during Pregnancy in Polish Healthcare Workers: Preliminary Results. <i>Vaccines (Basel)</i> . 2021 Jun 19;9(6):675.                                                                          | Unsuitable outcomes (antibody titres in cord blood)                                            |
| 14. | Parums DV. Editorial: Maternal SARS-CoV-2 Infection and Pregnancy Outcomes from Current Global Study Data. <i>Med Sci Monit</i> . 2021 Jul 5;27:e933831.                                                                                                                                                                | Unsuitable study design (editorial)<br>Unsuitable intervention (maternal SARS-CoV-2 infection) |
| 15. | Shanes ED, Otero S, Mithal LB, Mupanomunda CA, Miller ES, Goldstein JA. Severe Acute Respiratory Syndrome Coronavirus 2 (SARS-CoV-2) Vaccination in Pregnancy: Measures of Immunity and Placental Histopathology. <i>Obstet Gynecol</i> . 2021 Aug 1;138(2):281–3.                                                      | Unsuitable outcomes (antibody response and placental histopathology)                           |
| 16. | Successful vertical transmission of SARS-CoV-2 antibodies after maternal vaccination - Mehaffey - - Birth - Wiley Online Library [Internet]. [cited 2021 Sep 19]. Available from: <a href="https://onlinelibrary.wiley.com/doi/full/10.1111/birt.12582">https://onlinelibrary.wiley.com/doi/full/10.1111/birt.12582</a> | Unsuitable study design (case report)                                                          |

|     |                                                                                                                                                                                                                                                                                        |                                              |
|-----|----------------------------------------------------------------------------------------------------------------------------------------------------------------------------------------------------------------------------------------------------------------------------------------|----------------------------------------------|
| 17. | Charepe N, Gonçalves J, Juliano AM, et al. COVID-19 mRNA vaccine and antibody response in lactating women: a prospective cohort study. <i>BMC Pregnancy Childbirth</i> . 2021;21(1):632. Published 2021 Sep 17. doi:10.1186/s12884-021-04051-6                                         | Unsuitable population (lactating women)      |
| 18. | Nana M, Nelson-Piercy C. COVID-19 in pregnancy. <i>Clin Med (Lond)</i> . 2021;21(5):e446-e450. doi:10.7861/clinmed.2021-0503                                                                                                                                                           | Unsuitable study design (review article)     |
| 19. | Duarte G, Coutinho CM, Rolnik DL, et al. Perspectives on administration of COVID-19 vaccine to pregnant and lactating women: a challenge for low- and middle-income countries. <i>AJOG Glob Rep</i> . 2021;1(4):100020. doi:10.1016/j.xagr.2021.100020                                 | Unsuitable study design (clinical opinion)   |
| 20. | Girardi G, Bremer AA. Scientific Evidence Supporting Coronavirus Disease 2019 (COVID-19) Vaccine Efficacy and Safety in People Planning to Conceive or Who Are Pregnant or Lactating. <i>Obstet Gynecol</i> . 2022;139(1):3-8. doi:10.1097/AOG.0000000000004636                        | Unsuitable study design (current commentary) |
| 21. | Joubert E, Kekeh AC, Amin CN. COVID-19 and novel mRNA vaccines in pregnancy: an updated literature review [published online ahead of print, 2021 Oct 15]. <i>BJOG</i> . 2021;10.1111/1471-0528.16973. doi:10.1111/1471-0528.16973                                                      | Unsuitable study design (review article)     |
| 22. | Moro PL, Panagiotakopoulos L, Oduyebo T, Olson CK, Myers T. Monitoring the safety of COVID-19 vaccines in pregnancy in the US [published online ahead of print, 2021 Nov 10]. <i>Hum Vaccin Immunother</i> . 2021;1-9. doi:10.1080/21645515.2021.1984132                               | Unsuitable study design (review article)     |
| 23. | Mangat C, Milosavljevic N. BNT162b2 Vaccination during Pregnancy Protects Both the Mother and Infant: Anti-SARS-CoV-2 S Antibodies Persistently Positive in an Infant at 6 Months of Age. <i>Case Rep Pediatr</i> . 2021;2021:6901131. Published 2021 Oct 12. doi:10.1155/2021/6901131 | Unsuitable study design (case report)        |
| 24. | Sarwal Y, Sarwal T, Sarwal R. Vaccination of pregnant women against COVID-19 in India and Indonesia: Moving beyond the opt-in to the opt-out option. <i>Int J Gynaecol Obstet</i> . 2021;155(3):549-550. doi:10.1002/ijgo.13930                                                        | Unsuitable study design (opinion paper)      |
| 25. | Shook LL, Fallah PN, Silberman JN, Edlow AG. COVID-19 Vaccination in Pregnancy and Lactation: Current Research and Gaps in Understanding. <i>Front Cell Infect Microbiol</i> . 2021;11:735394. Published 2021 Sep 16. doi:10.3389/fcimb.2021.735394                                    | Unsuitable study design (review article)     |

|     |                                                                                                                                                                                                                                                                                      |                                                    |
|-----|--------------------------------------------------------------------------------------------------------------------------------------------------------------------------------------------------------------------------------------------------------------------------------------|----------------------------------------------------|
| 26. | Klein AZ, O'Connor K, Gonzalez-Hernandez G. Toward Using Twitter Data to Monitor Covid-19 Vaccine Safety in Pregnancy: A Proof-of-Concept Study of Cohort Identification [published online ahead of print, 2021 Nov 22]. <i>JMIR Form Res.</i> 2021;10.2196/33792. doi:10.2196/33792 | Unsuitable outcomes (user reported vaccine uptake) |
| 27. | Karrow NA, Shandilya UK, Pelech S, et al. Maternal COVID-19 Vaccination and Its Potential Impact on Fetal and Neonatal Development. <i>Vaccines (Basel)</i> . 2021;9(11):1351. Published 2021 Nov 18. doi:10.3390/vaccines9111351                                                    | Unsuitable study design (review article)           |
| 28. | Jorgensen SCJ, Burry L, Tabbara N. Role of maternal COVID-19 vaccination in providing immunological protection to the newborn [published online ahead of print, 2021 Nov 23]. <i>Pharmacotherapy</i> . 2021;10.1002/phar.2649. doi:10.1002/phar.2649                                 | Unsuitable study design (review article)           |
| 29. | Shimabukuro TT, Kim SY, Myers TR, et al. Preliminary Findings of mRNA Covid-19 Vaccine Safety in Pregnant Persons. <i>New England Journal of Medicine</i> . 2021/06/17 2021;384(24):2273-2282. doi:10.1056/NEJMoa2104983                                                             | Unsuitable study design (no comparator group)      |
| 30. | Trostle ME, Limaye MA, Avtushka V, Lighter JL, Penfield CA, Roman AS. COVID-19 vaccination in pregnancy: early experience from a single institution. <i>American journal of obstetrics &amp; gynecology MFM</i> . 2021;3(6):100464-100464. doi:10.1016/j.ajogmf.2021.100464          | Unsuitable study design (no comparator group)      |
| 31. | Zauche LH, Wallace B, Smoots AN, et al. Receipt of mRNA Covid-19 Vaccines and Risk of Spontaneous Abortion. <i>New England Journal of Medicine</i> . 2021;doi:10.1056/NEJMc2113891                                                                                                   | Unsuitable study design (no comparator group)      |

**Table S2. Characteristics of the studies included in the systematic review**

| Authors                            | Country                          | Study type   | Reported outcome categories                                                                                                                                                                                                                                                                                                                                                                               | Vaccinated | Unvaccinated | Data collection period                                                                              | Type of vaccine                                                                                                               | Number of doses received        | Timing of administration (trimester)                                                                                                                                                                                              |
|------------------------------------|----------------------------------|--------------|-----------------------------------------------------------------------------------------------------------------------------------------------------------------------------------------------------------------------------------------------------------------------------------------------------------------------------------------------------------------------------------------------------------|------------|--------------|-----------------------------------------------------------------------------------------------------|-------------------------------------------------------------------------------------------------------------------------------|---------------------------------|-----------------------------------------------------------------------------------------------------------------------------------------------------------------------------------------------------------------------------------|
| Beharier et al, 2021 <sup>19</sup> | Israel (8 Centres across Israel) | Case control | Birthweight in grams<br>Birthweight Z-score*<br>Gestational age at delivery<br>Gestational diabetes<br>HDP<br>Preeclampsia<br>NICU admission<br>Preterm birth below 37 weeks                                                                                                                                                                                                                              | 86         | 62           | For vaccine recipients -January 2021 to March 2021)<br><br>For controls - April 2020 and March 2021 | BNT162b2 (Pfizer–BioNTech) m RNA vaccine                                                                                      | Two doses                       | Not specified<br><br>GA at vaccination (Mean ± SD),weeks – 39.3 ± 1.3<br><br>Maternal age at vaccination (Mean ± SD),years – 31.7 ± 5.8                                                                                           |
| Blakeway et al, 2021 <sup>8</sup>  | UK                               | Cohort       | Birthweight Z-score<br>Caesarean section<br>Fetal abnormalities<br>Gestational age at delivery<br>ICU admission<br>Instrumental delivery<br>Intrapartum pyrexia<br>HDU admission<br>NICU admission<br>Placental abruption<br>Postpartum haemorrhage<br>Preterm birth before 37 weeks<br>SGA at birth<br>Stillbirth<br>Suspected chorioamnionitis<br>Vaginal delivery, any<br>Vaginal delivery, unassisted | 133        | 399          | March 1st to July 4th 2021                                                                          | BNT162b2 (Pfizer–BioNTech) m RNA vaccine,<br>Moderna-mRNA-1273 vaccine,<br>ChAdOx1 nCoV-19 viral-vector vaccine (AstraZeneca) | One dose -115<br>Both doses- 26 | 1 <sup>st</sup> trimester – 0<br>2 <sup>nd</sup> trimester- 20<br>3 <sup>rd</sup> trimester – 121<br><br>GA at vaccination (Mean ± SD),weeks – Not specified<br><br>Maternal age at vaccination, (Median ± IQR)- 35.0 (31.7-37.0) |
| Bleicher et al, 2021 <sup>20</sup> | Israel                           | Cohort       | Composite pregnancy complications<br>COVID-19 positive since last questionnaire                                                                                                                                                                                                                                                                                                                           | 202        | 124          | January 10, 2020 to January 15, 2020                                                                | BNT162b2 (Pfizer–BioNTech) m RNA vaccine                                                                                      | One dose – 78 (38.6%)           | 1 <sup>st</sup> trimester – 36 (17.8%)<br>2 <sup>nd</sup> trimester- 110 (54.5%)                                                                                                                                                  |

|                                            |        |              |                                                                                                                                                                                                                   |       |                        |                                     |                                                                                                                                                                       |                         |                                                                                                                                                                      |
|--------------------------------------------|--------|--------------|-------------------------------------------------------------------------------------------------------------------------------------------------------------------------------------------------------------------|-------|------------------------|-------------------------------------|-----------------------------------------------------------------------------------------------------------------------------------------------------------------------|-------------------------|----------------------------------------------------------------------------------------------------------------------------------------------------------------------|
|                                            |        |              | Fetal growth restriction<br>Pregnancy loss up to 13 weeks' gestation<br>Pregnancy loss 14-28 weeks' gestation<br>Antepartum bleeding<br>Anomaly on anatomy scan<br>HDP<br>Premature contractions<br>Preterm birth |       |                        |                                     |                                                                                                                                                                       | Two doses – 124 (61.4%) | 3 <sup>rd</sup> trimester – 56 (27.7%)<br><br>GA at vaccination (Mean ± SD), weeks – 20.14 ± 10.3<br><br>Maternal age at vaccination (Mean ± SD), years – 31.7 ± 3.9 |
| BORNOntario, 2021 <sup>21</sup>            | Canada | Case control | Stillbirth                                                                                                                                                                                                        | 31343 | 76488                  | January 1, 2021 to October 31, 2021 | BNT162b2 (Pfizer–BioNTech) m RNA vaccine,<br>Moderna-mRNA-1273 vaccine,<br>viral-vector vaccine (ChAdOx1 nCoV-19)<br>viral-vector vaccine (AstraZeneca or COVISHIELD) | Not specified           | Not specified<br><br>GA at vaccination (Mean ± SD), weeks – Not specified<br><br>Maternal age at vaccination (Mean ± SD), years – Not specified                      |
| Bookstein Peretz et al, 2021 <sup>13</sup> | Israel | Case-control | Birthweight in grams<br>Caesarean section<br>ELCS<br>EMCS                                                                                                                                                         | 57    | 260 non pregnant women | January 2021 to February 2021       | BNT162b2 (Pfizer–BioNTech) m RNA vaccine                                                                                                                              | Two doses – 57 (100%)   | 3 <sup>rd</sup> Trimester - 57                                                                                                                                       |



|                                |       |                                       |                                                                                                                                                                                                                                                                                                                                                                                                                                     |     |     |                                   |                                             |         |                                                                                                                                                                                                                                  |
|--------------------------------|-------|---------------------------------------|-------------------------------------------------------------------------------------------------------------------------------------------------------------------------------------------------------------------------------------------------------------------------------------------------------------------------------------------------------------------------------------------------------------------------------------|-----|-----|-----------------------------------|---------------------------------------------|---------|----------------------------------------------------------------------------------------------------------------------------------------------------------------------------------------------------------------------------------|
|                                |       |                                       | Endometritis<br>Gestational age at delivery<br>Gestational diabetes<br>HDP<br>Induction of labour<br>Instrumental delivery<br>Miscarriage<br>Neonatal CPR<br>Neonatal death<br>Neonatal fever<br>Neonatal invasive ventilation<br>Neonatal oxygen<br>NICU admission<br>Oligohydramnios<br>Placental abruption<br>Polyhydramnios<br>Postpartum haemorrhage<br>Preterm birth before 37 weeks' gestation<br>SGA at birth<br>Stillbirth |     |     |                                   |                                             |         | GA at vaccination<br>(Mean $\pm$ SD), weeks –<br>Not specified<br><br>Maternal age at vaccination<br>(Mean $\pm$ SD), years –<br>Not specified                                                                                   |
| Butt et al, 2021 <sup>22</sup> | Qatar | Cohort and test-negative case-control | SARS-CoV-2 infection<br>Maternal death                                                                                                                                                                                                                                                                                                                                                                                              | 407 | 407 | December 20, 2020 to May 30, 2021 | Pfizer-BNT-162b2, Moderna-mRNA-1273 vaccine | 2 doses | 1 <sup>st</sup> trimester – 323 (79.4%)<br>2 <sup>nd</sup> trimester – 84 (20.6%)<br><br>GA at vaccination<br>(Mean $\pm$ SD), weeks –<br>Not specified<br><br>Maternal age at vaccination,<br>(Median $\pm$ IQR)-<br>32 (29–36) |

|                                      |                                                 |        |                                                                                                                                                                                                                                                                                                                                                           |       |       |                                     |                                          |               |                                                                                                                                                                                                                                                              |
|--------------------------------------|-------------------------------------------------|--------|-----------------------------------------------------------------------------------------------------------------------------------------------------------------------------------------------------------------------------------------------------------------------------------------------------------------------------------------------------------|-------|-------|-------------------------------------|------------------------------------------|---------------|--------------------------------------------------------------------------------------------------------------------------------------------------------------------------------------------------------------------------------------------------------------|
| Dagan et al, 2021 <sup>23</sup>      | Israel (Clalit Health Services)                 | Cohort | Documented infection with SARS-CoV-2<br>Symptomatic COVID-19<br>COVID-19-related hospitalisation<br>Severe illness and death                                                                                                                                                                                                                              | 10861 | 10861 | December 20 2020 to June 3, 2021    | BNT162b2 (Pfizer–BioNTech) m RNA vaccine | Two doses     | 1 <sup>st</sup> trimester- 2814 (26%)<br>2 <sup>nd</sup> trimester- 5242 (48%)<br>3 <sup>rd</sup> trimester- 2805 (26%)<br><br>GA at vaccination (Mean $\pm$ SD),weeks – Not specified<br><br>Maternal age at vaccination (Mean $\pm$ SD),years – 30 (26-33) |
| Goldshteyn et al, 2021 <sup>24</sup> | Israel (Maccabi Health Care Services, Tel Aviv) | Cohort | Primary outcome: documented SARS-CoV-2 infection 28 days or more after the first vaccine dose<br>Other outcomes:<br>Birthweight in grams<br>Gestational age at delivery<br>IUGR<br>Maternal death<br>Miscarriage<br>Pulmonary embolism<br>Preeclampsia<br>Preterm birth before 37 weeks' gestation<br>SARS CoV-2-associated hospitalisation<br>Stillbirth | 7530  | 7530  | December 19, 2020-February 28, 2021 | BNT162b2 (Pfizer–BioNTech) m RNA vaccine | Not specified | 2 <sup>nd</sup> Trimester- 46%<br>3 <sup>rd</sup> trimester- 33%<br><br>GA at vaccination (Mean $\pm$ SD),weeks – Not specified<br><br>Maternal age at vaccination (Mean $\pm$ SD),years – 31.1 (5.01)                                                       |

|                                    |                                                          |        |                                                                                                                                                                                                                                                                                                                                                                                                 |                                    |                                                           |                                                  |                                                                                                    |                |                                                                                                                                                                                                             |
|------------------------------------|----------------------------------------------------------|--------|-------------------------------------------------------------------------------------------------------------------------------------------------------------------------------------------------------------------------------------------------------------------------------------------------------------------------------------------------------------------------------------------------|------------------------------------|-----------------------------------------------------------|--------------------------------------------------|----------------------------------------------------------------------------------------------------|----------------|-------------------------------------------------------------------------------------------------------------------------------------------------------------------------------------------------------------|
| Gray et al, 2021 <sup>25</sup>     | USA                                                      | Cohort | Assisted ventilation<br>Birthweight in grams<br>Caesarean section<br>Grade 3/4 intraventricular haemorrhage<br>HDP<br>IUGR<br>Necrotising enterocolitis<br>Neonatal sepsis<br>Neonatal death<br>Neonatal oxygen<br>Neonatal seizure<br>NICU admission<br>Preterm birth before 37 weeks' gestation<br>Respiratory distress syndrome<br>Special care nursery admission<br>TTN<br>Vaginal delivery | 13                                 | 16 non pregnant women                                     | Between December 17, 2020, and February 23, 2021 | BNT162b2 (Pfizer–BioNTech) mRNA vaccine, Moderna-mRNA-1273 vaccine                                 | Two doses      | 3 <sup>rd</sup> trimester (100%)<br><br>GA at vaccination (Mean $\pm$ SD), weeks – Not specified<br><br>Maternal age at vaccination (Mean $\pm$ SD), years – Not specified for the included cohort of women |
| Kachikis et al, 2021 <sup>26</sup> | COVID-19 Vaccine in Pregnancy and Lactation Registry USA | Cohort | Miscarriage rate following second dose of vaccination                                                                                                                                                                                                                                                                                                                                           | 7809 pregnant women, 288 delivered | 6815 lactating individuals<br><br>2901 non pregnant women | January to March 2021                            | BNT162b2 (Pfizer–BioNTech) mRNA vaccine, Moderna-mRNA-1273 vaccine, Ad26.COV.2.S (Janssen) vaccine | Two doses-6586 | Data available for 7611<br>1 <sup>st</sup> trimester - 1822<br>2 <sup>nd</sup> trimester- 3694<br>3 <sup>rd</sup> trimester- 2095<br><br>GA at vaccination (Mean $\pm$ SD), weeks – Not specified           |

|                                     |                                                 |        |                                                                     |                                            |                                             |                                    |                                                                                                     |                                                        |                                                                                                                                                                                             |
|-------------------------------------|-------------------------------------------------|--------|---------------------------------------------------------------------|--------------------------------------------|---------------------------------------------|------------------------------------|-----------------------------------------------------------------------------------------------------|--------------------------------------------------------|---------------------------------------------------------------------------------------------------------------------------------------------------------------------------------------------|
|                                     |                                                 |        |                                                                     |                                            |                                             |                                    |                                                                                                     |                                                        | Maternal age at vaccination (Mean $\pm$ SD),years – Not specified for the included cohort of women                                                                                          |
| Kharbanda et al, 2021 <sup>27</sup> | The Vaccine Safety Datalink USA                 | Cohort | Spontaneous abortions within 28 days of receipt of COVID-19 vaccine | 19824                                      | 85622                                       | December 15, 2020 to June 28, 2021 | BNT162b2 (Pfizer–BioNTech) m RNA vaccine, Moderna-mRNA-1273 vaccine, Ad26.COV.2.S (Janssen) vaccine | Not specified                                          | Not specified<br><br>GA at vaccination (Mean $\pm$ SD),weeks – Not specified<br><br>Maternal age at vaccination (Mean $\pm$ SD),years – Not specified for the included cohort of women      |
| Lipkind et al, 2022 <sup>28</sup>   | Morbidity and Mortality weekly report, CDC, USA | Cohort | Preterm births before 37 weeks' gestation<br>SGA                    | For preterm birth – 10064<br>For SGA- 8928 | For preterm birth – 36015<br>For SGA- 31699 | December 15, 2020 to July 22, 2021 | BNT162b2 (Pfizer–BioNTech) m RNA vaccine, Moderna-mRNA-1273 vaccine, Ad26.COV.2.S (Janssen) vaccine | One dose – 1759 (18.2%)<br><br>Two doses- 7881 (81.8%) | 1 <sup>st</sup> trimester - 172 (1.7%)<br>2 <sup>nd</sup> trimester- 3668 (36.5%)<br>3 <sup>rd</sup> trimester- 6224 (61.8%)<br><br>GA at vaccination (Mean $\pm$ SD),weeks – Not specified |

|                                         |        |              |                                                                                                                                                                                                     |                                                                               |                                                                                  |                                       |                                                                                                                                                   |                                                     |                                                                                                                                                        |
|-----------------------------------------|--------|--------------|-----------------------------------------------------------------------------------------------------------------------------------------------------------------------------------------------------|-------------------------------------------------------------------------------|----------------------------------------------------------------------------------|---------------------------------------|---------------------------------------------------------------------------------------------------------------------------------------------------|-----------------------------------------------------|--------------------------------------------------------------------------------------------------------------------------------------------------------|
|                                         |        |              |                                                                                                                                                                                                     |                                                                               |                                                                                  |                                       |                                                                                                                                                   |                                                     | Maternal age at vaccination (Mean $\pm$ SD),years – 32.3 (4.5)                                                                                         |
| Magnus et al, 2021 <sup>29</sup>        | Norway | Case-control | Miscarriage within 5 weeks of vaccination<br>Miscarriage within 3 weeks of vaccination                                                                                                              | For miscarriage within 5 weeks – 1003<br>For miscarriage within 3 weeks – 595 | For miscarriage within 5 weeks – 17474<br>For miscarriage within 3 weeks – 17882 | February 15, 2021 to August 15, 2021  | BNT162b2 (Pfizer–BioNTech) m RNA vaccine,<br>Moderna-mRNA-1273 vaccine,<br>ChAdOx1 nCoV-19 viral-vector vaccine (AstraZeneca)                     | One dose -539<br><br>Two doses - 233                | Not specified<br><br>GA at vaccination (Mean $\pm$ SD),weeks – Not specified<br><br>Maternal age at vaccination (Mean $\pm$ SD),years – Not specified  |
| Morgan et al, 2021 <sup>30</sup>        | USA    | Cohort       | Severe or critical COVID-19<br>Severe COVID-19<br>Critical COVID-19<br>Positive SARS-COV-2 infection<br>Stillbirth<br>Maternal death<br>ICU admission<br>Remdesivir<br>Dexamethasone<br>Tocilizumab | 1332                                                                          | 8760                                                                             | From June 15, 2021 to August 20, 2021 | BNT162b2 (Pfizer–BioNTech) m RNA vaccine<br>883 (66.3%),<br>Moderna-mRNA-1273 vaccine - 382 (28.7%)<br>Ad26.COV.2.S (Janssen) vaccine - 67 (5.0%) | One dose for Janssen<br>Two doses for mRNA vaccine) | Not specified<br><br>GA at vaccination (Mean $\pm$ SD),weeks – Not specified<br><br>Maternal age at vaccination (Mean $\pm$ SD),years – 32.1 $\pm$ 5.9 |
| Rottenstreich et al, 2021 <sup>31</sup> | Israel | Cohort       | HDP<br>Diabetes<br>Gestational age at delivery                                                                                                                                                      | 712                                                                           | 1063                                                                             | January 19, 2021 to 27 April 2021     | BNT162b2 (Pfizer–BioNTech) m RNA vaccine                                                                                                          | Two doses                                           | 3 <sup>rd</sup> trimester (100%)                                                                                                                       |

|  |  |  |                                                                                                                                                                                                                                                                                                                                                                                                                                                                                                                                                                                                                                                                                                                                                                                                                                                                                                                                                                                                                                           |  |  |  |  |                                                                                                                                                                            |
|--|--|--|-------------------------------------------------------------------------------------------------------------------------------------------------------------------------------------------------------------------------------------------------------------------------------------------------------------------------------------------------------------------------------------------------------------------------------------------------------------------------------------------------------------------------------------------------------------------------------------------------------------------------------------------------------------------------------------------------------------------------------------------------------------------------------------------------------------------------------------------------------------------------------------------------------------------------------------------------------------------------------------------------------------------------------------------|--|--|--|--|----------------------------------------------------------------------------------------------------------------------------------------------------------------------------|
|  |  |  | <p>Gestational age at delivery 34 weeks</p> <p>Gestational age at delivery &lt;37 weeks</p> <p>Induction of labour</p> <p>Oxytocin augmentation of labour</p> <p>Epidural analgesia</p> <p>Meconium-stained amniotic fluid</p> <p>Chorioamnionitis</p> <p>Caesarean delivery</p> <p>Elective Caesarean delivery</p> <p>In-labour Caesarean delivery</p> <p>Home/car delivery</p> <p>Vacuum-assisted delivery</p> <p>Hospitalisation length, days</p> <p>Prolonged hospital stay</p> <p>Episiotomy</p> <p>Maternal ICU admission</p> <p>Postpartum haemorrhage</p> <p>Placental abruption</p> <p>Haemoglobin drop, g/dl</p> <p>Haemoglobin drop &gt;4 g/dl</p> <p>Puerperal fever</p> <p>Blood product transfusion</p> <p>Composite adverse maternal outcome</p> <p>Birthweight &gt; 4000 g</p> <p>LGA</p> <p>SGA</p> <p>1-minute Apgar score <math>\leq 7</math></p> <p>5-minute Apgar score <math>\leq 7</math></p> <p>Intrauterine fetal death</p> <p>NICU admission</p> <p>Meconium aspiration syndrome</p> <p>Jaundice</p> <p>TTN</p> |  |  |  |  | <p>GA at vaccination (Mean <math>\pm</math> SD), weeks – Not specified</p> <p>Maternal age at vaccination (Mean <math>\pm</math> SD), years – 30.6<math>\pm</math> 5.8</p> |
|--|--|--|-------------------------------------------------------------------------------------------------------------------------------------------------------------------------------------------------------------------------------------------------------------------------------------------------------------------------------------------------------------------------------------------------------------------------------------------------------------------------------------------------------------------------------------------------------------------------------------------------------------------------------------------------------------------------------------------------------------------------------------------------------------------------------------------------------------------------------------------------------------------------------------------------------------------------------------------------------------------------------------------------------------------------------------------|--|--|--|--|----------------------------------------------------------------------------------------------------------------------------------------------------------------------------|

|                                   |                                        |              |                                                                                                                                                                                                                                                                                                                                                                                                                                                                                                                                                                                                                                                        |     |      |                                               |                                                                                                                                          |               |                                                                                                                                                           |
|-----------------------------------|----------------------------------------|--------------|--------------------------------------------------------------------------------------------------------------------------------------------------------------------------------------------------------------------------------------------------------------------------------------------------------------------------------------------------------------------------------------------------------------------------------------------------------------------------------------------------------------------------------------------------------------------------------------------------------------------------------------------------------|-----|------|-----------------------------------------------|------------------------------------------------------------------------------------------------------------------------------------------|---------------|-----------------------------------------------------------------------------------------------------------------------------------------------------------|
|                                   |                                        |              | <p>Mechanical ventilation<br/>Seizures<br/>Hypoglycaemia<br/>Sepsis<br/>Encephalopathy<br/>Intracranial haemorrhage<br/>Birth asphyxia<br/>Composite adverse neonatal outcome</p>                                                                                                                                                                                                                                                                                                                                                                                                                                                                      |     |      |                                               |                                                                                                                                          |               |                                                                                                                                                           |
| Theiler et al, 2021 <sup>32</sup> | USA<br><br>(Mayo Clinic Health system) | Case-control | <p>3rd or 4th degree laceration<br/>5 minute Apgar score &lt;7<br/>Adverse Outcomes Index<br/>Adverse Outcomes Index excluding laceration<br/>Birth trauma<br/>Caesarean section<br/>Hypoxic Ischaemic Encephalopathy<br/>ICU admission<br/>Instrumental delivery<br/>Low birth weight (&lt;2500g)<br/>NICU admit &gt;2500g<br/>Pulmonary embolism<br/>PIH<br/>Postpartum haemorrhage<br/>Preeclampsia<br/>Preterm birth before 37 weeks' gestation<br/>Return to operating theatre<br/>Stillbirth<br/>Stroke<br/>Transfusion<br/>Uterine rupture<br/>Vaginal delivery, any<br/>Vaginal delivery, unassisted<br/>Very low birth weight (&lt;1500g)</p> | 140 | 1862 | Between December 10, 2020, and April 19, 2021 | <p>BNT162b2 (Pfizer–BioNTech) m RNA vaccine<br/>-127 women,<br/>Moderna-mRNA-1273 vaccine – 12<br/>Ad26.COV.2.S (Janssen) vaccine -1</p> | Not specified | <p>Not specified</p> <p>GA at vaccination (Median, IQR), weeks – 35.4 (17.2-44.2)</p> <p>Maternal age at vaccination (Mean ± SD), years – 31.8 (3.72)</p> |

|                                                                        |        |        |                                                                                                                                                                                                                                                                                                                             |                               |        |                              |                                                                                                                                                      |                                                       |                                                                                                                                                                                                                                                                                                    |
|------------------------------------------------------------------------|--------|--------|-----------------------------------------------------------------------------------------------------------------------------------------------------------------------------------------------------------------------------------------------------------------------------------------------------------------------------|-------------------------------|--------|------------------------------|------------------------------------------------------------------------------------------------------------------------------------------------------|-------------------------------------------------------|----------------------------------------------------------------------------------------------------------------------------------------------------------------------------------------------------------------------------------------------------------------------------------------------------|
| UKHSA<br>25th Nov<br>2021<br>weekly<br>surveillance data <sup>33</sup> | UK     | Cohort | Stillbirth rate<br>Low birthweight <2500 g<br>Very low birthweight <1500 g<br>Preterm birth < 37 weeks' gestation<br>Very premature birth < 32 weeks' gestation<br>Extremely premature < 28 weeks' gestation                                                                                                                | 24,759<br>(at least one dose) | 329158 | January 2021, to August 2021 | BNT162b2 (Pfizer–BioNTech) m RNA vaccine - 80.8%,<br>ChAdOx1 nCoV-19 viral-vector vaccine (AstraZeneca) - 11.1%,<br>Moderna-mRNA-1273 vaccine - 8.1% | Not specified                                         | Data available for 18,187 women.<br>1 <sup>st</sup> trimester- 695 (3.8%),<br>2 <sup>nd</sup> trimester- 4,487 (24.7%)<br>3 <sup>rd</sup> trimester - 13005(71.5%)<br><br>GA at vaccination (Mean ± SD),weeks – Not specified<br><br>Maternal age at vaccination (Mean ± SD),years – Not specified |
| Wainstock et al, 2021 <sup>34</sup>                                    | Israel | Cohort | Gestational diabetes<br>HDP<br>Oligohydramnios<br>Polyhydramnios<br>Pathological presentation<br>Meconium-stained amniotic fluid<br>Gestational age at delivery<br>Apgar score <7 at 5 minutes<br>Non reassuring fetal monitoring<br>Caesarean delivery<br>Vacuum delivery<br>Placental abruption<br>Postpartum haemorrhage | 913                           | 3486   | January 2021 to June 2021    | BNT162b2 (Pfizer–BioNTech) m RNA vaccine                                                                                                             | One dose – 155 (17.0%)<br><br>Two doses – 758 (83.0%) | 2 <sup>nd</sup> /3 <sup>rd</sup> trimester (exact numbers not specified)<br><br>GA at vaccination (Mean ± SD),weeks – Not specified<br><br>Maternal age at vaccination (Mean ± SD),years –                                                                                                         |



|                                   |                                                            |     |                                                                                                                                                                                                                                                                                                                                                                                                          |    |    |                                        |                                                    |           |               |
|-----------------------------------|------------------------------------------------------------|-----|----------------------------------------------------------------------------------------------------------------------------------------------------------------------------------------------------------------------------------------------------------------------------------------------------------------------------------------------------------------------------------------------------------|----|----|----------------------------------------|----------------------------------------------------|-----------|---------------|
|                                   |                                                            |     | Maternal postpartum fever<br>Length of maternal hospitalisation following Caesarean delivery, days<br>Length of maternal hospitalisation following vaginal delivery, days<br>Birthweight, g<br>SGA<br>Newborn respiratory complications<br>Newborn fever<br>Length of neonatal hospitalisation following Caesarean delivery, days<br>Length of neonatal hospitalisation following vaginal delivery, days |    |    |                                        |                                                    |           | 30.6 ± 5.3    |
| Baden et al, 2021 <sup>35</sup>   | USA                                                        | RCT | Miscarriage                                                                                                                                                                                                                                                                                                                                                                                              | 6  | 7  | July 27 2020 to October 23, 2020       | Moderna-mRNA-1273 vaccine                          | Two doses | Not specified |
| Hillson et al, 2021 <sup>36</sup> | Brazil<br>South Africa<br>UK                               | RCT | Miscarriage, excluding Brazilian data<br>Termination, excluding Brazilian data<br>Miscarriage or termination, all<br>Preterm birth                                                                                                                                                                                                                                                                       | 43 | 24 |                                        | ChAdOx1 nCoV-19 viral-vector vaccine (AstraZeneca) | Two doses | Not specified |
| Polack et al, 2020 <sup>1</sup>   | Argentina<br>Brazil<br>USA                                 | RCT | Miscarriage                                                                                                                                                                                                                                                                                                                                                                                              | 11 | 12 | July 27, 2020 to November 14, 2020     | BNT162b2 (Pfizer–BioNTech) m RNA vaccine           | Two doses | Not specified |
| Sadoff et al, 2021 <sup>37</sup>  | Argentina<br>Brazil<br>Chile<br>Columbia<br>Mexico<br>Peru | RCT | Miscarriage                                                                                                                                                                                                                                                                                                                                                                                              | 4  | 4  | September 21, 2020 to January 22, 2021 | Ad26.COV.2.S (Janssen) vaccine                     | One dose  | Not specified |

|                                 |                                 |     |             |    |   |                                 |                                                          |              |               |
|---------------------------------|---------------------------------|-----|-------------|----|---|---------------------------------|----------------------------------------------------------|--------------|---------------|
|                                 | South<br>Africa<br>USA          |     |             |    |   |                                 |                                                          |              |               |
| Voysey et al, 2021 <sup>2</sup> | Brazil<br>South<br>Africa<br>UK | RCT | Miscarriage | 12 | 9 | April 23 to<br>November 4, 2020 | ChAdOx1 nCoV-19<br>viral-vector vaccine<br>(AstraZeneca) | Two<br>doses | Not specified |

GA: Gestational age, SD: Standard deviation, IQR: Inter Quartile range, RCT: randomized controlled trial, HDP: hypertensive disorders of pregnancy, SGA: small for gestational age, PIH: pregnancy induced hypertension, NICU: neonatal intensive care unit, ICU: intensive care unit, TTN: transient tachypnea of newborn, LGA: large for gestational age, IUGR: intrauterine growth restriction, CPR: cardiopulmonary resuscitation, ELCS: elective caesarean section, EMCS: emergency caesarean section

\*Estimated using the raw data reported by the authors

**Table S3.** ROBINS-I risk of bias assessment of observational studies.

| Author, year          | Confounding | Selection of participants | Classification of interventions | Deviations from interventions | Missing data | Measurement of outcomes | Selection of the reported result | Overall bias |
|-----------------------|-------------|---------------------------|---------------------------------|-------------------------------|--------------|-------------------------|----------------------------------|--------------|
| Beharier, 2021        | Serious     | Moderate                  | Low                             | Low                           | Moderate     | Low                     | Moderate                         | Serious      |
| Blakeway, 2021        | Moderate    | Low                       | Low                             | Low                           | Low          | Low                     | Moderate                         | Moderate     |
| Bleicher 2021         | Serious     | Serious                   | Low                             | Low                           | Low          | Moderate                | Low                              | Serious      |
| BORNOntario, 2021     | Moderate    | Low                       | Low                             | Low                           | Low          | Moderate                | Low                              | Moderate     |
| BooksteinPeretz, 2021 | Moderate    | Moderate                  | Low                             | Low                           | Low          | Moderate                | Low                              | Moderate     |
| Butt, 2021            | Moderate    | Low                       | Low                             | Low                           | Low          | Low                     | Low                              | Moderate     |
| Dagan, 2021           | Moderate    | Low                       | Low                             | Low                           | Low          | Low                     | Low                              | Moderate     |
| Goldshtein, 2021      | Moderate    | Low                       | Low                             | Low                           | Low          | Low                     | Moderate                         | Moderate     |
| Gray, 2021            | Moderate    | Moderate                  | Low                             | Low                           | Low          | Low                     | Low                              | Moderate     |
| Kachikis, 2021        | Low         | Low                       | Low                             | Low                           | Low          | Moderate                | Low                              | Moderate     |
| Kharbanda, 2021       | Moderate    | Low                       | Low                             | Low                           | Low          | Low                     | Low                              | Moderate     |
| Lipkind, 2022         | Moderate    | Low                       | Low                             | Low                           | Low          | Low                     | Low                              | Moderate     |
| Magnus, 2021          | Moderate    | Low                       | Low                             | Low                           | Low          | Low                     | Low                              | Moderate     |
| Morgan, 2021          | Moderate    | Moderate                  | Low                             | Low                           | Low          | Low                     | Low                              | Moderate     |
| Rottenstreich 2021    | Moderate    | Low                       | Low                             | Low                           | Low          | Low                     | Low                              | Moderate     |
| Theiler, 2021         | Serious     | Low                       | Low                             | Low                           | Low          | Low                     | Moderate                         | Serious      |
| UKHSA, 2021           | Moderate    | Low                       | Low                             | Low                           | Low          | Moderate                | Low                              | Moderate     |
| Wainstock, 2021       | Moderate    | Moderate                  | Low                             | Low                           | Low          | Low                     | Low                              | Moderate     |

Low risk: comparable to a well-performed randomised trial; moderate risk: sound for a non-randomised study but cannot be compared to a well-performed randomised trial; serious risk: study has some important problems; critical risk: study is too problematic to provide any useful evidence.

**Table S4.** Cochrane Risk of Bias Tool 2 for randomized trials.

| <b>Author, year</b> | <b>Randomisation process</b> | <b>Deviations from intended interventions</b> | <b>Missing outcome data</b> | <b>Measurement of outcome</b> | <b>Reported results</b> | <b>Overall risk</b> |
|---------------------|------------------------------|-----------------------------------------------|-----------------------------|-------------------------------|-------------------------|---------------------|
| Baden, 2021         | Low                          | Low                                           | Low                         | Low                           | Low                     | Low                 |
| Voysey, 2020        | Low                          | Low                                           | Low                         | Low                           | Low                     | Low                 |
| Polack, 2020        | Low                          | Low                                           | Low                         | Low                           | Low                     | Low                 |
| Sadoff, 2021        | Low                          | Low                                           | Low                         | Low                           | Low                     | Low                 |
| Hillson, 2021       | Low                          | Low                                           | Low                         | Low                           | Low                     | Low                 |

**Table S5.** Literature search strategy.

| <b>Set#</b> | <b>Search term</b>                                                                                                                                               |
|-------------|------------------------------------------------------------------------------------------------------------------------------------------------------------------|
| S1          | tio,ab(pregnan*)                                                                                                                                                 |
| S2          | EMB.EXACT("prenatal care")                                                                                                                                       |
| S3          | MESH.EXACT("Prenatal Care")                                                                                                                                      |
| S4          | EMB.EXACT.EXPLODE("pregnancy") OR EMB.EXACT("pregnant woman")                                                                                                    |
| S5          | MESH.EXACT.EXPLODE("Pregnancy") OR MESH.EXACT.EXPLODE("Pregnancy Trimesters") OR MESH.EXACT("Pregnancy Complications") OR MESH.EXACT("Pregnant Women")           |
| S6          | ('coronaviridae'/exp OR coronavirus OR 'corona virus') AND (wuhan OR 'beijing'/exp OR eijing OR shanghai OR '2019 ncov' OR ncover OR 'covid 19' OR 'sars cov 2') |
| S7          | (exp coronavirus/ or coronavirus.mp. or corona virus) and (wuhan or eijing or shanghai or 2019-nCoV or nCover or COVID-19 or SARS-CoV-2)                         |
| S8          | EMB.EXACT.EXPLODE("CORONAVIRIDAE INFECTION") OR EMB.EXACT.EXPLODE("CORONAVIRUS INFECTIONS")                                                                      |
| S9          | tio,ab("COVID-19" or "SARS-CoV-2" or "2019-nCoV" or "n-CoV" and "coronavirus")                                                                                   |
| S10         | tio,ab(Immuniz* OR immunis* OR vaccin*)                                                                                                                          |
| S11         | S5 OR S4 OR S3 OR S2 OR S1                                                                                                                                       |
| S12         | S9 OR S8 OR S7 OR S6                                                                                                                                             |
| S13         | S12 AND S11 AND S10                                                                                                                                              |
| S14         | (S12 AND S11 AND S10) and (pd(2020-2021))                                                                                                                        |
| S15         | (S12 AND S11 AND S10) and (pd(20201101-20211201))                                                                                                                |
| S16         | (S12 AND S11 AND S10) and (pd(20201101-20211201) and (pd(20201201-20210830)))                                                                                    |
